# Supplementary material for: Association of Continuous Assessment of Step Count by Remote Monitoring With Disability Progression Among Adults With Multiple Sclerosis
Source: PubMed Central journal article supplement (PMC6484622; doi:10.1001/jamanetworkopen.2019.0570), 2019-03-15
Supplement: jamanetwopen-2-e190570-s001.pdf [file jamanetwopen-2-e190570-s001.pdf]

## Supplementary Online Content

Block VJ, Bove R, Zhao C, et al. Association of continuous assessment of step count by remote monitoring with disability progression among adults with multiple sclerosis. *JAMA Netw Open*. 2019;2(3):e190570.

doi:10.1001/jamanetworkopen.2019.0570

**eTable 1.** Demographic Information for All Participants

**eTable 2.** Demographic Table of Withdrawn or Lost to Follow-up Compared With the Completer Cohort

**eTable 3.** Comparison of Shorter Epochs of Remote Average Daily Step Count to Continuous 1-Year Monitoring in People Without Ambulatory Disability (EDSS < 4.0) and People With Ambulatory Disability (EDSS ≥ 4.0)

**eTable 4.** Odds of Disability Worsening at 1 Year in a Multivariable Logistic Regression Model

This supplementary material has been provided by the authors to give readers additional information about their work.

**eTable 1.** Demographic Information for All Participants

| <b>Demographic</b>                                | <b>Total</b>      | <b>EDSS<br/>0-1.5</b> | <b>EDSS<br/>2-3.5</b> | <b>EDSS<br/>4.0</b> | <b>EDSS<br/>4.5-5.5</b> | <b>EDSS<br/>6.0</b> | <b>EDSS<br/>6.5</b> |
|---------------------------------------------------|-------------------|-----------------------|-----------------------|---------------------|-------------------------|---------------------|---------------------|
| <b>Study Sample</b>                               | 95                | 14                    | 23                    | 14                  | 12                      | 18                  | 14                  |
| <b>Sex, Female. N (%)</b>                         | 59<br>(62.1)      | 9<br>(15.3)*          | 17<br>(28.8)*         | 5<br>(8.5)*         | 7<br>(11.9)*            | 14<br>(23.7)*       | 7<br>(11.9)*        |
| <b>Age (years), mean<br/>(SD)</b>                 | 49.6<br>(13.6)    | 38.7<br>(13.2)        | 43.1<br>(11.5)        | 57.3<br>(11.7)      | 53.7<br>(9.6)           | 53.3<br>(11.1)      | 58.5<br>(13.2)      |
| <b>Disease Duration<br/>(years), median [IQR]</b> | 13<br>[5.0- 20.5] | 4.6<br>[3.0-8.0]      | 7.4<br>[2.9-14.5]     | 20.5<br>[9.9-30.9]  | 12.7<br>[8.7-15.3]      | 14.8<br>[5.6-22.9]  | 20.5<br>[14.6-22]   |
| <b>Relapsing MS (N)</b>                           | 60                | 14                    | 20                    | 7                   | 6                       | 9                   | 7                   |
| <b>Progressive MS (N)</b>                         | 35                | 0                     | 3                     | 7                   | 6                       | 9                   | 7                   |

**Legend:** MS = multiple sclerosis, EDSS = expanded disability status scale, N = number, SD = standard deviation, IQR = inter quartile range

\* = percentages calculated using total Female as denominator (N=59)

**eTable 2.** Demographic Table of Withdrawn or Lost to Follow-up Compared With the Completer Cohort

| <b>Demographics and Outcomes</b>                | <b>Completer Cohort (n=79)</b> | <b>Withdrawn or lost to follow-up (n=16)</b> | <b>Total (n=95)</b>    | <b>P Value (chi<sup>2</sup>)</b> |
|-------------------------------------------------|--------------------------------|----------------------------------------------|------------------------|----------------------------------|
| <b>Female.</b> N (%)<br><b>Male.</b> N (%)      | 30 (38.0)<br>49 (62.0)         | 6 (37.5)<br>10 (62.5)                        | 36 (37.9)<br>59 (62.1) | .97<br>(.001)                    |
| <b>EDSS.</b> Median [IQR]                       | 4.0 [2.5, 6.0]                 | 3.5 [2.4, 4.9]                               | 4.0 [2.5, 6.0]         | .275                             |
| <b>Age.</b> Mean (SD)                           | 50.3 (13.7)                    | 45.9 (12.6)                                  | 49.6 (13.6)            | .237                             |
| <b>Disease Duration (years)</b><br>Median [IQR] | 13.0 [5.5, 20.5]               | 8.0 [3.0, 16.8]                              | 13.0 [5.0, 20.5]       | .620                             |
| <b>MS subtype.</b> RR: N (%),<br>Prog: N (%)    | 49 (62),<br>30 (38)            | 11 (69),<br>5 (31)                           | 60 (63),<br>35 (37)    | .82<br>(.05)                     |
| <b>T25FW.</b> Mean (SD)                         | 7.3 (5.8)                      | 7.4 (5.0)                                    | 7.3 (5.6)              | .922                             |
| <b>TUG.</b> Mean (SD)                           | 12.2 (12.0)                    | 10.8 (6.0)                                   | 11.9 (11.2)            | .650                             |
| <b>MSWS-12.</b> Mean (SD)                       | 36.2 (15.5)                    | 36.1 (15.7)                                  | 36.2 (15.4)            | .983                             |
| <b>MFIS-5.</b> Mean (SD)                        | 9.9 (4.9)                      | 9.8 (5.8)                                    | 9.9 (5.0)              | .958                             |
| <b>MHI-5.</b> Mean (SD)                         | 20.4 (2.1)                     | 19.6 (3.1)                                   | 20.2 (2.3)             | .249                             |
| <b>BLCS.</b> Mean (SD)                          | 6.0 (5.9)                      | 5.2 (6.7)                                    | 5.9 (6.0)              | .660                             |
| <b>PES.</b> Mean (SD)                           | 13.1 (5.6)                     | 16.1 (6.2)                                   | 13.6 (5.8)             | .057                             |
| <b>WHODAS.</b> Mean (SD)                        | 10.4 (7.5)                     | 12.4 (9.3)                                   | 10.7 (7.8)             | .357                             |

**Legend:** EDSS = Expanded disability status scale, IQR = interquartile range, SD = standard deviation, N/A = not applicable.

T25FW = Timed-25-Foot walk, TUG = Timed-up and Go, MSWS-12 = 12-item MS walking scale, MFIS-5 = 5 item Modified Fatigue Impact Scale, MHI-5 = 5-item Mental health Inventory, BLCS = Bladder control scale, PES = pain effects scales, WHODAS = World Health Organization Disability Assessment Schedule.

**eTable 3.** Comparison of Shorter Epochs of Remote Average Daily Step Count to Continuous 1-Year Monitoring in People Without Ambulatory Disability (EDSS < 4.0) and People With Ambulatory Disability (EDSS ≥ 4.0)

| Slope of continuous average daily step count monitoring for 1 year compared to the slope derived from: | EDSS < 4.0<br>(slope of 1 year = - 9.34) |           | EDSS ≥ 4.0<br>(slope of 1 year = - 3.31) |           |
|--------------------------------------------------------------------------------------------------------|------------------------------------------|-----------|------------------------------------------|-----------|
|                                                                                                        | Slope of shorter monitoring time         | [P Value] | Slope of shorter monitoring time         | [P Value] |
| Weeks 1 to 3                                                                                           | 330.21                                   | .005*     | 125.33                                   | .000**    |
| Weeks 1 to 4                                                                                           | 186.32                                   | .048*     | 96.65                                    | .000 **   |
| Weeks 1 to 5                                                                                           | -96.42                                   | .615      | 117.47                                   | .000 **   |
| ...                                                                                                    |                                          |           |                                          |           |
| Weeks 1 to 31                                                                                          | -4.11                                    | .594      | -11.64                                   | .021*     |
| Weeks 1 to 32                                                                                          | -3.71                                    | .545      | -10.27                                   | .048*     |
| Weeks 1 to 33                                                                                          | -3.66                                    | .520      | -8.09                                    | .184      |
| ...                                                                                                    |                                          |           |                                          |           |
| First 2 weeks (1-2), and last 2 weeks (51-52)                                                          | -13.13                                   | .616      | 2.31                                     | .056      |
| Baseline (weeks 1-4), month 6 and month 12.                                                            | -13.21                                   | .615      | 2.35                                     | .096      |

**Legend:** EDSS = Expanded Disability Status Scale.

Significance: \* p <.05, \*\* p <.001

To determine how shorter epochs of remote average daily step count compare to continuous monitoring for 1-year, we analyzed the difference in slopes for shorter durations, systematically eliminating one month at a time, compared to 1-year data. We dichotomized by EDSS to account for walking disability: participants with some walking disability (EDSS ≥ 4.0) and participants with minimal-to-no walking disability (EDSS<4.0). Shown in the table are the weeks where there was a transition to or from significance between the slopes.

**eTable 4.** Odds of Disability Worsening at 1 Year in a Multivariable Logistic Regression Model

| <b>Outcome or Demographic</b>                      | <b>Odds Ratio</b> | <b>Confidence Interval</b> | <b>P Value</b> |
|----------------------------------------------------|-------------------|----------------------------|----------------|
| <b>EDSS Clinically Meaningful Worsening†</b>       |                   |                            |                |
| Median Average Daily Step Count at Baseline < 4766 | 4.01              | 1.17 – 13.78               | .03            |
| Age at Baseline (years)                            | 2.45              | 0.81 – 7.43                | .11            |
| Sex (Male)                                         | 0.97              | 0.93 – 1.02                | .21            |
| Disease Duration                                   | 0.98              | 0.92 – 1.04                | .47            |
| <b>Timed-25 Foot Walk Worsening†</b>               |                   |                            |                |
| Median Average Daily Step Count at Baseline < 4766 | 3.50              | 1.02 – 12.03               | .04            |
| Age at Baseline (years)                            | 3.02              | 0.94 – 9.69                | .06            |
| Sex (Male)                                         | 0.99              | 0.94 – 1.04                | .64            |
| Disease Duration (years)                           | 1.01              | 0.95 – 1.07                | .76            |

**Legend:** EDSS = Expanded Disability Status Scale.

† Clinically-meaningful disability (EDSS) change was defined as: a 1.5 point change when baseline EDSS score was 0.0 to 1.0; a 1.0 point change when baseline EDSS score was 1.5 to 5.0; and a 0.5 point change when baseline EDSS score was 5.5 to 6.5. A 20% change was considered clinically meaningful for T25FW.

Significance p values:  $P < .05$ . Adjusting for disease duration did not significantly alter the results.
